# Supplementary material for: Comparison of monosegmented flow analysis to flow injection for single particle inductively coupled plasma mass spectrometry
Source: Royal Society of Chemistry journal article supplement (doi:10.1039/d1ja00457c), 2022-01-01
Supplement: d1ja00457c1.pdf [file d1ja00457c1.pdf]

### Supplementary information

#### Comparison of Monosegmented Flow Analysis to Flow Injection for Single Particle Inductively Coupled Plasma Mass Spectrometry

by Andrew Williams and Diane Beauchemin

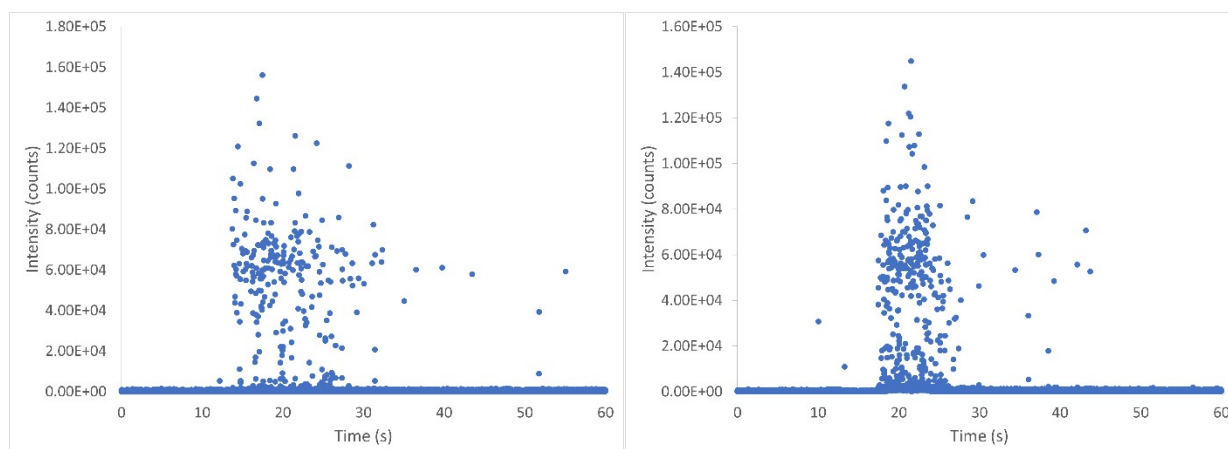

**Fig. S1** Temporal profiles obtained for one injection of Au NPs suspension by FI-spICPMS (left) and MSFA-spICPMS (right) with a new injection valve

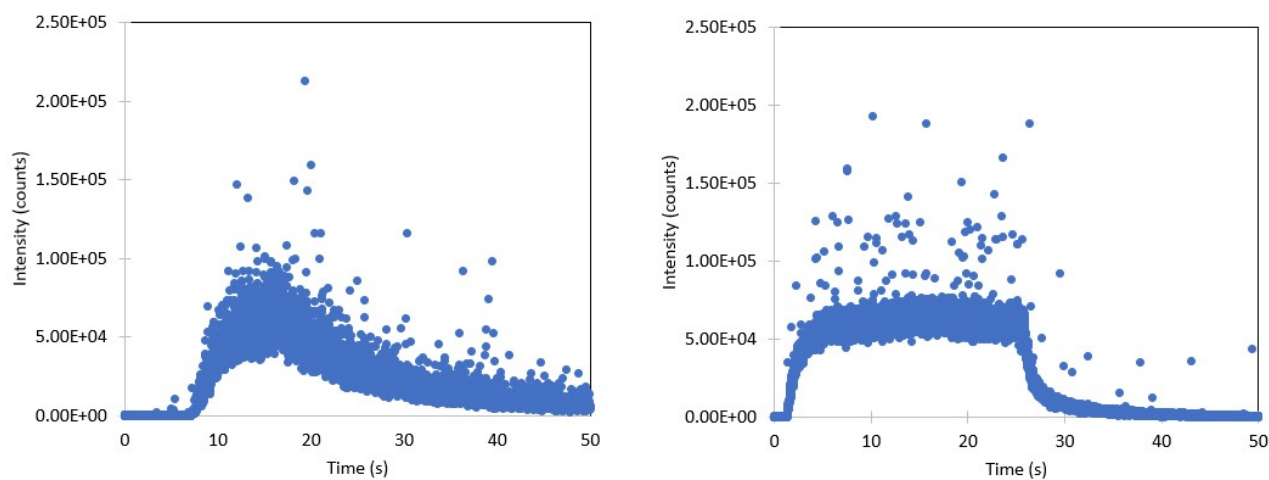

**Fig. S2** Temporal profiles obtained for one injection of  $5 \mu\text{g L}^{-1}$  Au solution by FI-spICPMS (left) and MSFA-spICPMS (right) with an old injection valve
